# Supplementary material for: Reversal of the Detrimental Effects of Post-Stroke Social Isolation by Pair-Housing is Mediated by Activation of BDNF-MAPK/ERK in Aged Mice
Source: PubMed Central journal article supplement (PMC4850427; doi:10.1038/srep25176), 2016-04-29
Supplement: srep25176-s1.pdf [file srep25176-s1.pdf]

**Supplementary informations:**

**Reversal of the Detrimental Effects of Post-Stroke Social Isolation by Pair-Housing is Mediated by Activation of BDNF-MAPK/ERK in Aged Mice**

Rajkumar Verma<sup>a</sup>, Nia M. Harris<sup>a</sup>, Brett D Friedler<sup>a</sup>, Joshua Crapser<sup>a</sup>, Anita R Patel<sup>a</sup>,  
Venugopal Venna<sup>a</sup> & Louise D McCullough<sup>a,b,\*</sup>

<sup>a</sup> Department of Neuroscience, University of Connecticut Health Center, Farmington, CT, USA

<sup>b</sup> Department of Neurology, University of Texas Health Science Center, Houston, TX 77030

**Running Title:** Isolation exacerbates stroke in aged mice

**Corresponding author:** Louise D. McCullough,

University of Texas Health Science Center, McGovern Medical School

6431 Fannin, Houston, TX 77030 Phone: 713-500-7079

E-mail: Louise.D.McCullough@uth.tmc.edu

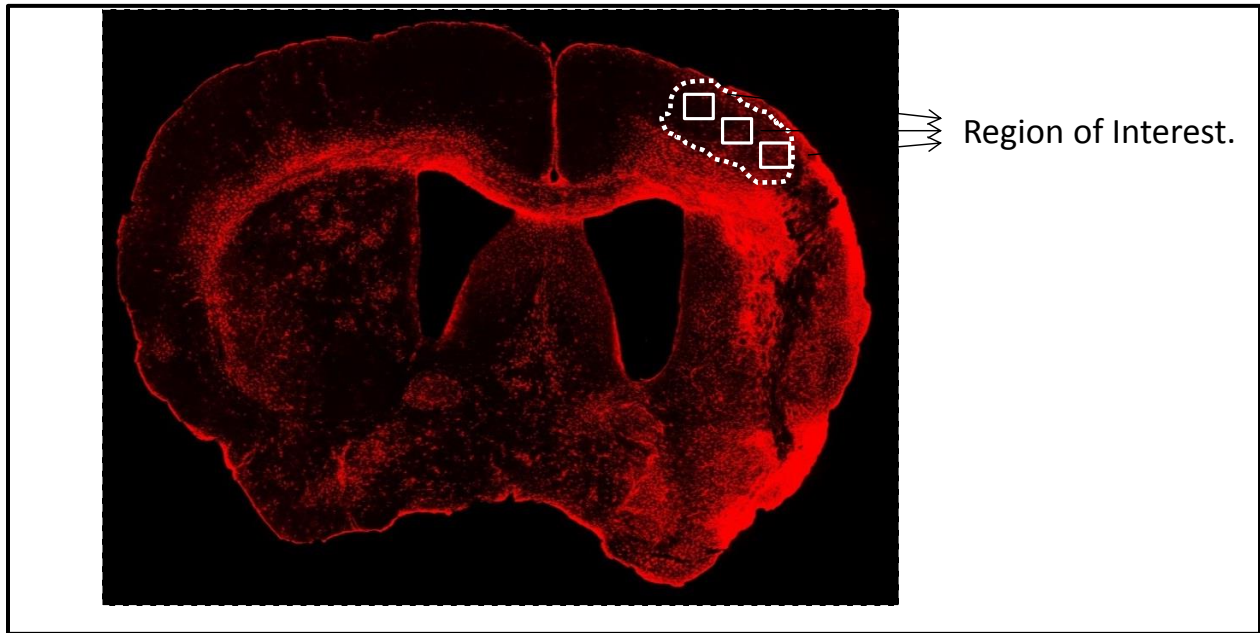

Supplementary Figure 1: Illustration showing the “region of interest” for IHC works.

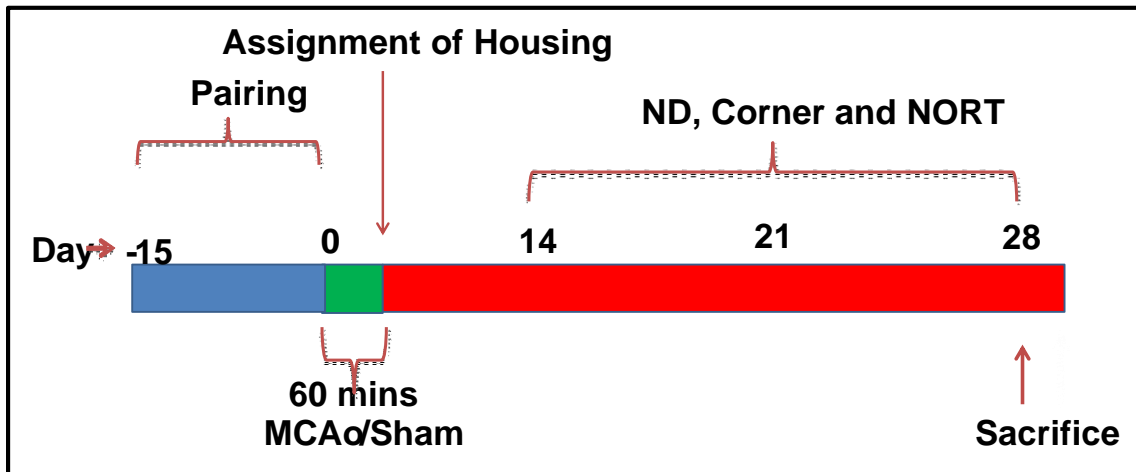

Supplementary Figure 2: Schematic of the behavioral testing paradigm in the chronic survival group.
